# Supplementary material for: Non-noble metal plasmonic photocatalysis in semimetal bismuth films for photocatalytic NO oxidation
Source: Royal Society of Chemistry journal article supplement (doi:10.1039/c7cp04359g), 2017-01-01
Supplement: c7cp04359g1.pdf [file c7cp04359g1.pdf]

## Supporting Information

### **Non-noble metal plasmonic photocatalysis in semimetal bismuth films for photocatalytic NO oxidation**

Ying Zhou<sup>\*ab</sup>, Wei Li,<sup>a</sup> Qian Zhang,<sup>a</sup> Shuai Yan,<sup>c</sup> Yuehan Cao,<sup>a</sup> Fan Dong,<sup>\*d</sup> and Fang Wang<sup>a</sup>

<sup>a</sup>) The Center of New Energy Materials and Technology, School of Materials Science and Engineering, Southwest Petroleum University, Chengdu 610500, China

<sup>b</sup>) State Key Laboratory of Oil and Gas Reservoir and Exploitation, Southwest Petroleum University, Chengdu 610500, China

<sup>c</sup>) Institute of Microelectronics, Chinese Academy of Sciences, Beijing 100029, China

<sup>d</sup>) College of Environmental and resources, Chongqing Technology and Business University, Chongqing 400067, China

<sup>\*</sup>To whom correspondence should be addressed

Email: [yzhou@swpu.edu.cn](mailto:yzhou@swpu.edu.cn) (Y. Zhou); [dfctbu@126.com](mailto:dfctbu@126.com) (F. Dong)

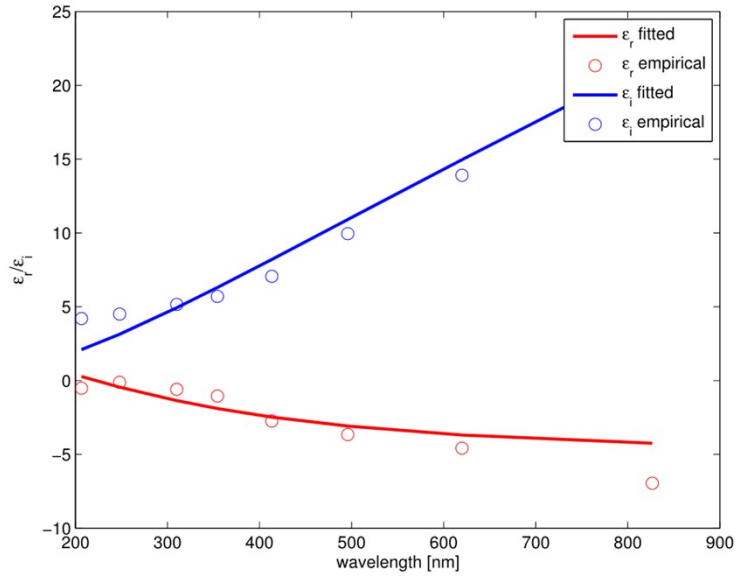

**Fig. S1** Empirical dielectric constant data and the fitted dielectric function with Drude model for Bi

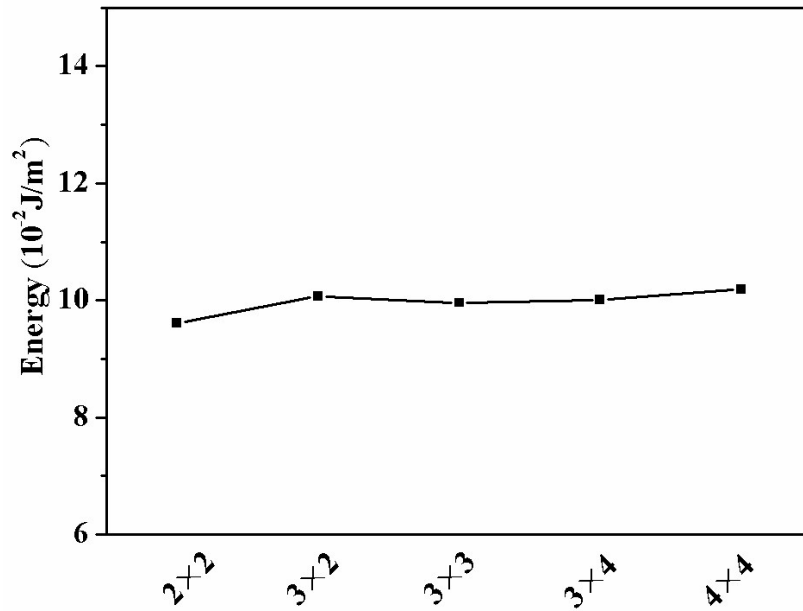

**Fig. S2** The surface energy convergence tests of Bismuth surface.

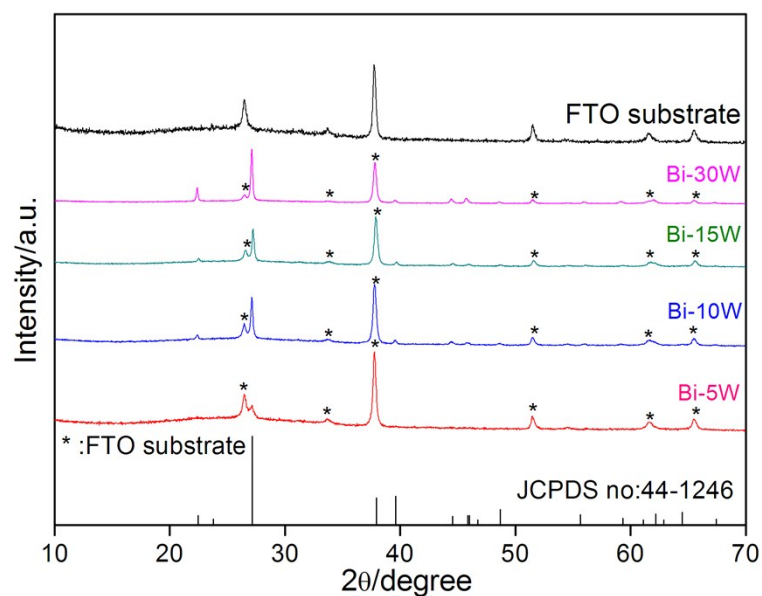

**Fig. S3** PXRD patterns of Bi films prepared at different conditions (Bi-5W, Bi-10W, Bi-15W, Bi-30W) and the FTO substrate.

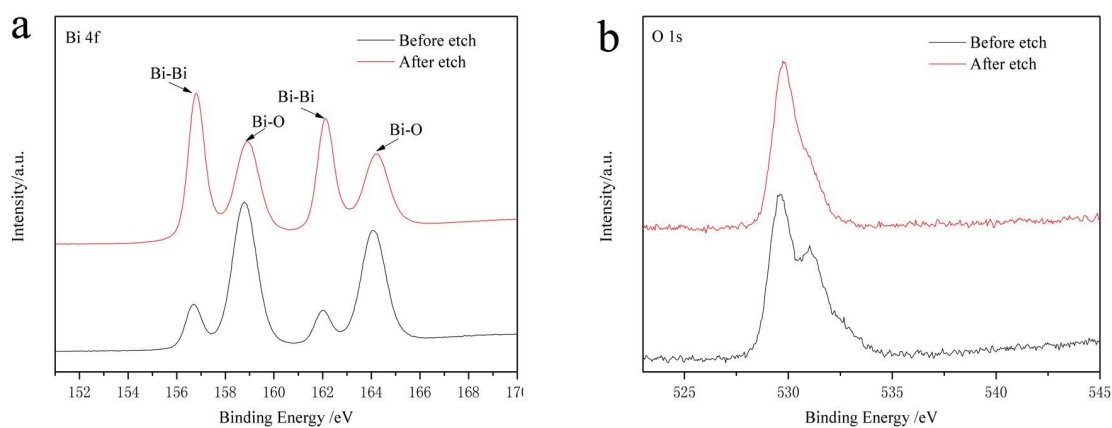

**Fig. S4** (a) Bi 4f and (b) O 1s XPS spectra of Bi particles before and after ion etching.

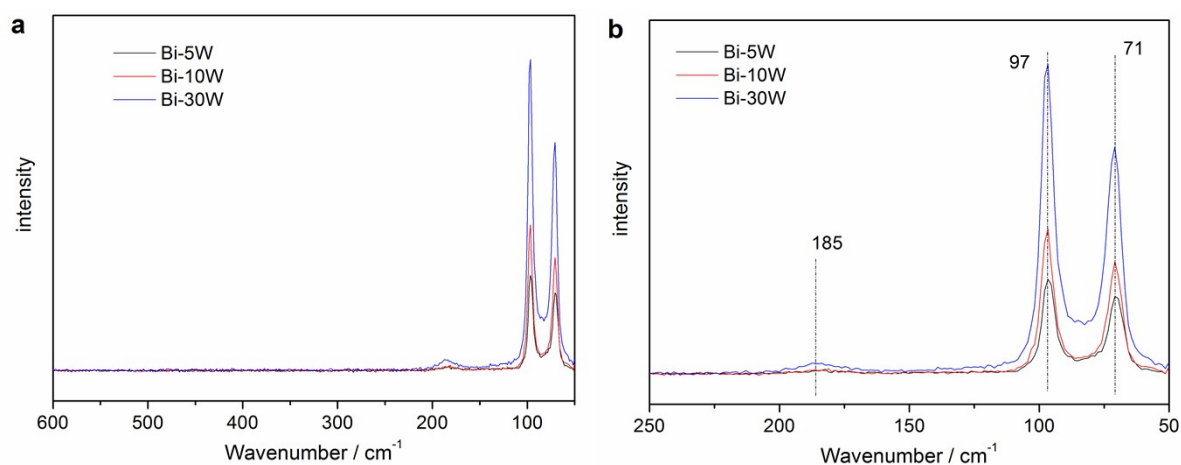

**Fig.S5** Raman spectroscopy of Bi-5W, Bi-10W and Bi-30W

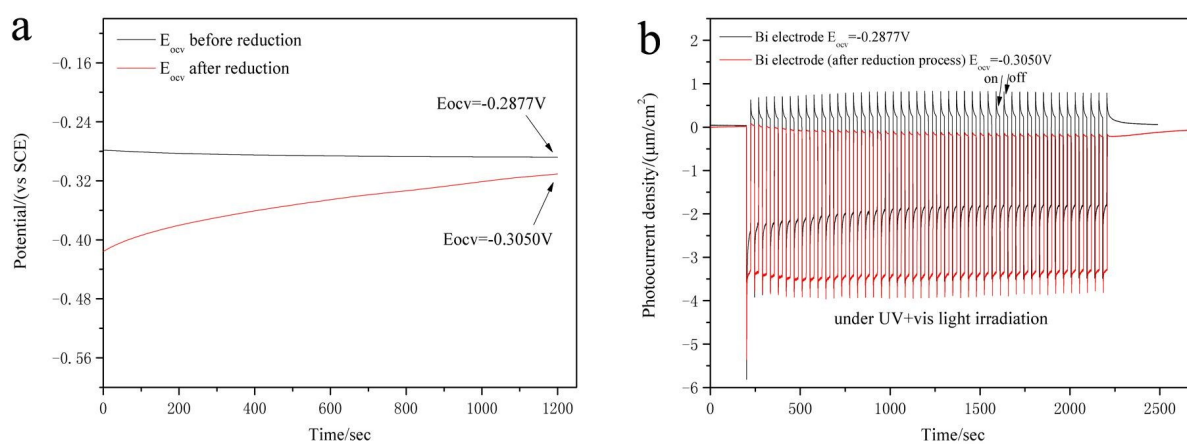

**Fig. S6** (a) Open Circuit Voltage for the Bi-5W before and after electrochemical reduction in 0.5M  $\text{Na}_2\text{SO}_4$  solution; (b) the photocurrent-time curve for Bi-5W before and after reduction at OCV under UV-vis light irradiation

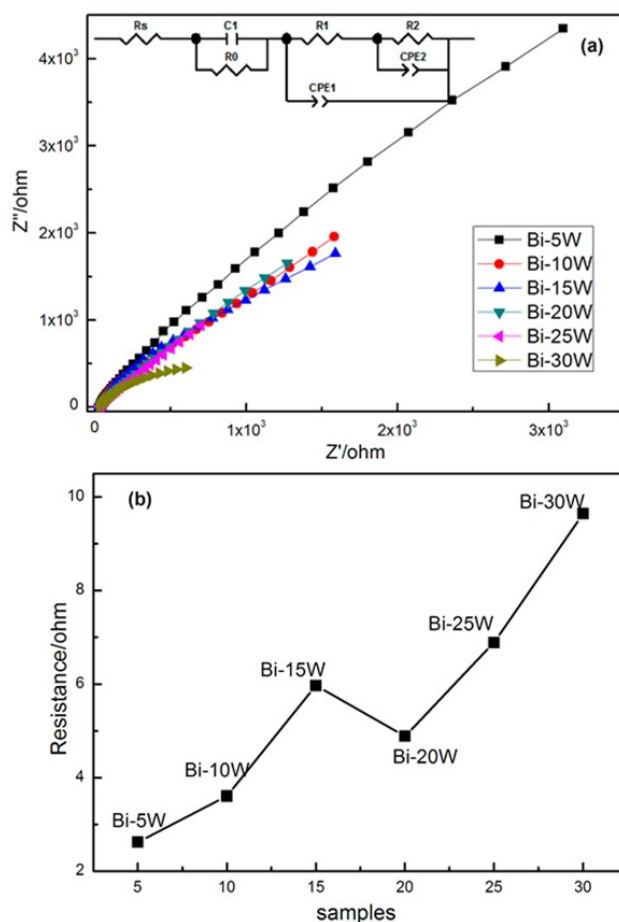

**Fig. S7** (a) The electrochemistry impedance spectroscopy (EIS) of different Bi films tested in 0.5M  $\text{Na}_2\text{SO}_4$  solution at Open Circuit Voltage (OCV) in dark, the insert is the EEC; (b) the resistance value ( $R_0$ ) of different Bi films calculated from the EEC parameters.

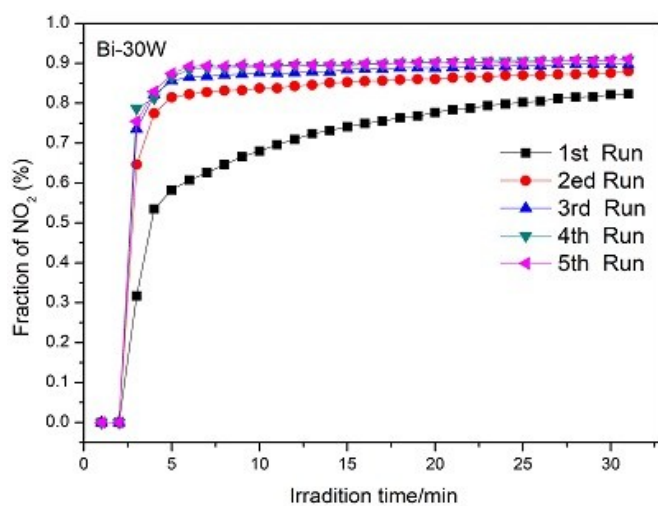

**Fig. S8** Monitoring of the fraction of  $\text{NO}_2$  intermediate over Bi film

### Path 1

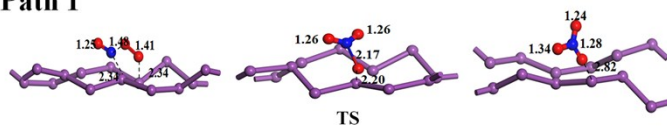

### Path 2

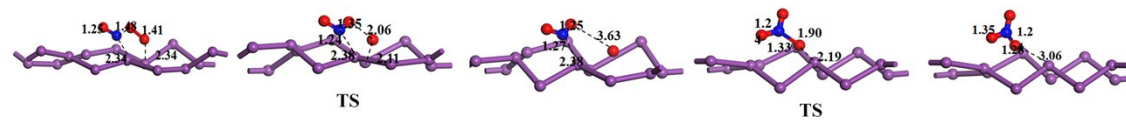

### Path 3

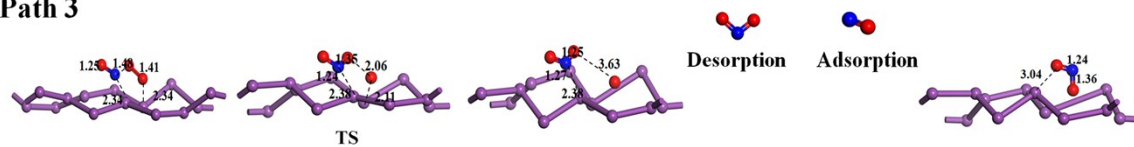

**Fig. S9** The structures corresponding to the reaction path followed by the NO oxidation mechanism on the Bi surface. All lengths are given in Å.

**Table S1** The amount of charge transfer ( $\Delta q$ ) of reactions, products and transition states. (Numerical values are given in units of e.)

| Path | Reaction 1 | TS 1 | Product 1 | Reaction 2 | TS 2 | Product 2 |
|------|------------|------|-----------|------------|------|-----------|
| 1    | 0.78       | 1.30 | 0.56      | --         | --   | --        |
| 2    | 0.78       | 1.11 | 1.42      | 1.42       | 0.36 | 0.65      |
| 3    | 0.78       | 1.11 | 1.42      | 0.52       | 0.52 | 0.52      |
